# Supplementary material for: Imaging and SERS Study of the Au Nanoparticles Interaction with HPV and Carcinogenic Cervical Tissues
Source: MDPI journal article supplement (doi:10.3390/molecules26123758), 2021-06-20
Supplement: s1 [file s1]

## Supplementary information

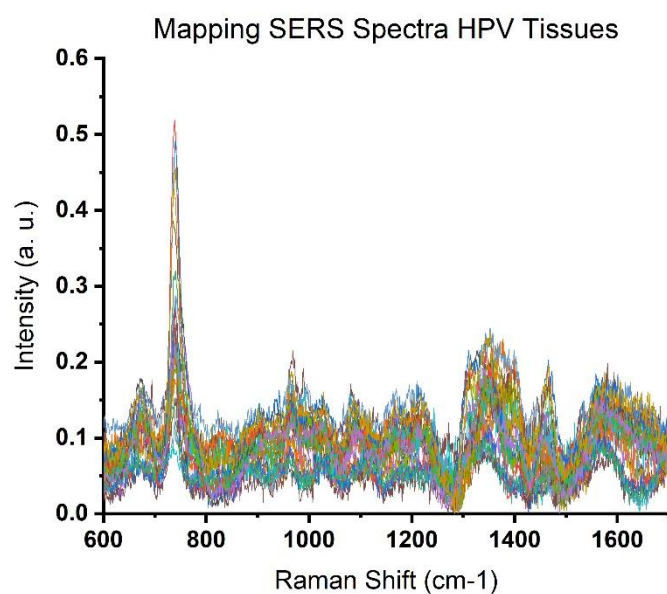

Figure S1 SERS spectra of HPV infected tissues mapping (n=30), analysed at a wavelength of 785 nm.

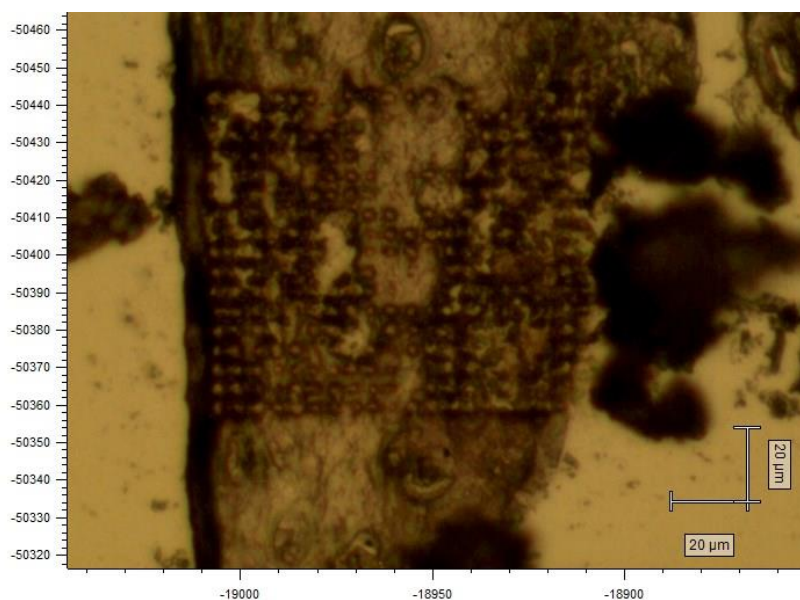

Figure S2 Micrography of an HPV infected tissue after the mapping raman análisis.

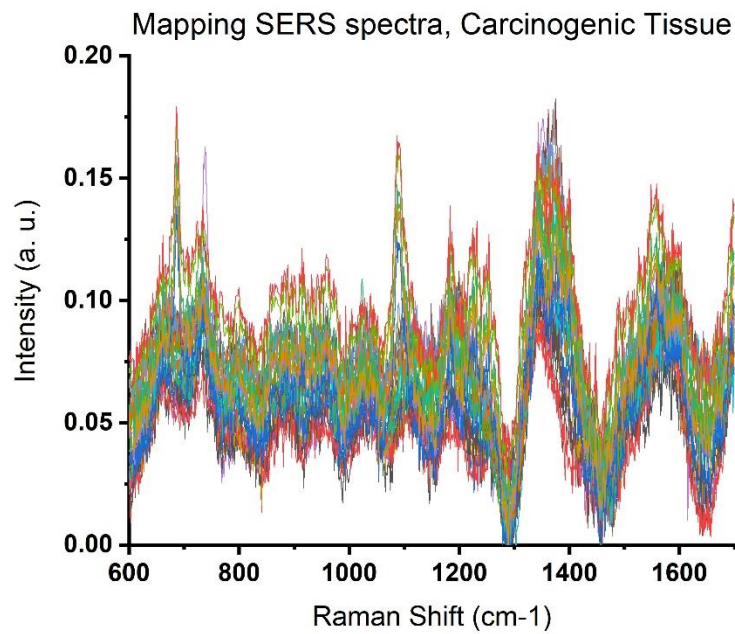

Figure S3 SERS spectra of Carcinogenic tissues mapping (n=30), analysed at a wavelength of 785 nm.

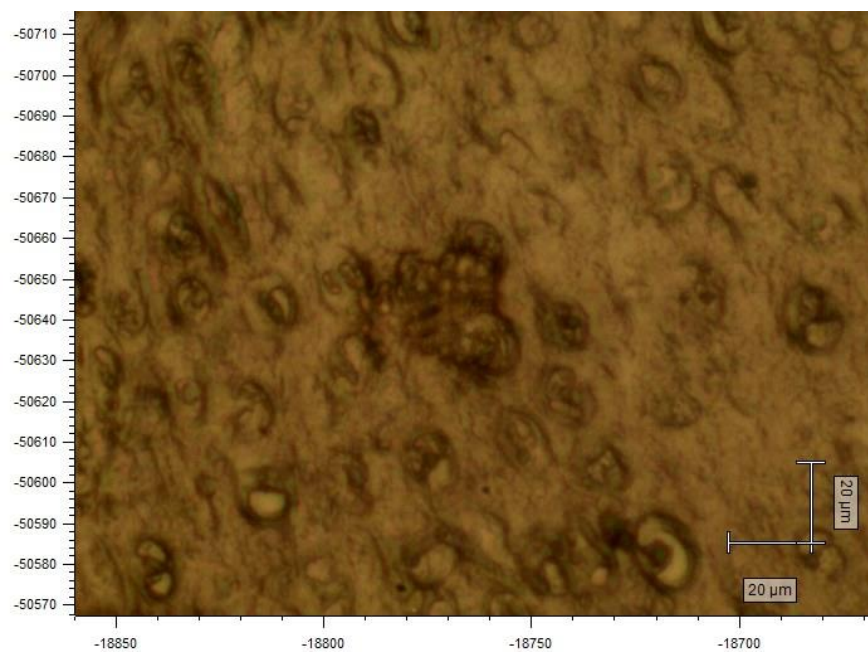

Figure S4 Micrography of a carcinogenic tissue after the mapping raman análisis.
